# Supplementary material
Source: MDPI journal article supplement (https://www.mdpi.com/1424-8247/17/2/180)
Supplement: s1 [file s1]

Supplementary Material

| Brevifolincarboxylic acid               |           |       | Castalagin                              |           |       | Ellagic acid                            |           |       | Gallic acid                             |           |       |
|-----------------------------------------|-----------|-------|-----------------------------------------|-----------|-------|-----------------------------------------|-----------|-------|-----------------------------------------|-----------|-------|
| Real                                    | Predicted |       |
|                                         | 1         | 2     |                                         | 1         | 2     |                                         | 1         | 2     |                                         | 1         | 2     |
| 1                                       | 40.0%     | 10.0% | 1                                       | 40.0%     | 10.0% | 1                                       | 55.6%     | 0%    | 1                                       | 22.2%     | 22.2% |
| 2                                       | 10.0%     | 40.0% | 2                                       | 10.0%     | 40.0% | 2                                       | 22.2%     | 22.2% | 2                                       | 0%        | 55.6% |
| Total percentage of correct predictions |           | 80.0% | Total percentage of correct predictions |           | 80.0% | Total percentage of correct predictions |           | 77.8% | Total percentage of correct predictions |           | 77.8% |

  

| Latifolicinin C acid                    |           |       | Protocatechuic acid                     |           |       | Protocatechuic aldehyde                 |           |       | Aesculetin                              |           |       |
|-----------------------------------------|-----------|-------|-----------------------------------------|-----------|-------|-----------------------------------------|-----------|-------|-----------------------------------------|-----------|-------|
| Real                                    | Predicted |       |
|                                         | 1         | 2     |                                         | 1         | 2     |                                         | 1         | 2     |                                         | 1         | 2     |
| 1                                       | 57.1%     | 0%    | 1                                       | 33.3%     | 11.1% | 1                                       | 10.0%     | 30.0% | 1                                       | 40.0%     | 20.0% |
| 2                                       | 0%        | 42.9% | 2                                       | 11.1%     | 44.5% | 2                                       | 0%        | 60.0% | 2                                       | 0%        | 40.0% |
| Total percentage of correct predictions |           | 100%  | Total percentage of correct predictions |           | 77.8% | Total percentage of correct predictions |           | 70.0% | Total percentage of correct predictions |           | 80.0% |

**Figure S1.** Confusion matrices considering only the validation set for the chemical parameters under study. Legend: 1- group with values higher than average; 2- group with values below than average.

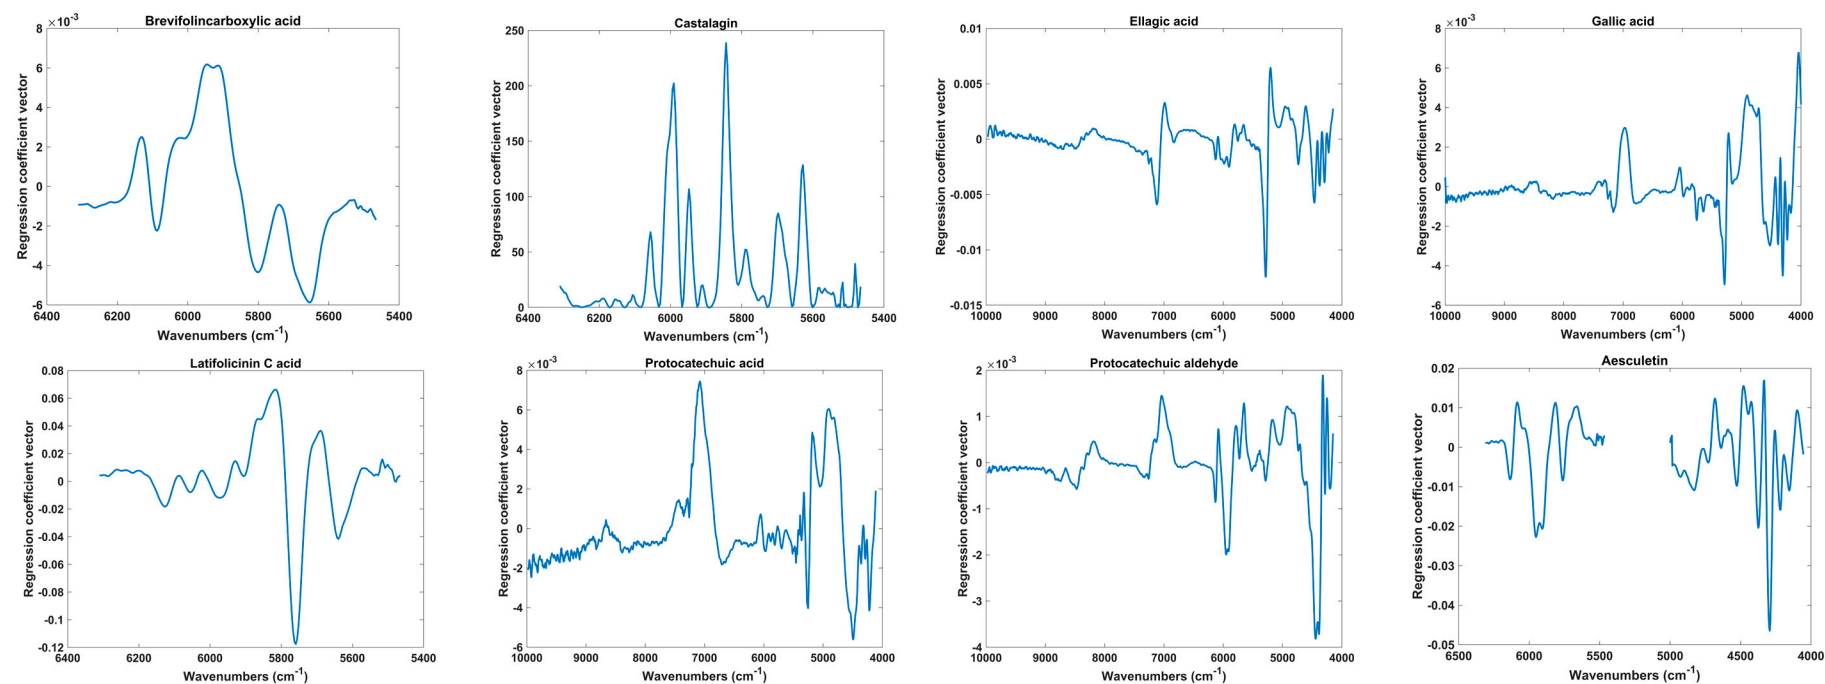

**Figure S2.** Regression coefficient vectors of the PLS-DA models for the discrimination of samples with high and low amounts of brevifolincarboxylic acid, castalagin, ellagic acid, gallic acid, latifolicinin C acid, protocatechuic acid, protocatechuic aldehyde and aesculetin.

**Table S1.** Chemical structures and physicochemical properties of the standards [6].

| Compound                      | Structure                                                                           | Molecular weigh | Exact mass | pKa  | logP | IC <sub>50</sub> (DPPH)  |
|-------------------------------|-------------------------------------------------------------------------------------|-----------------|------------|------|------|--------------------------|
| Gallic acid (1)               | 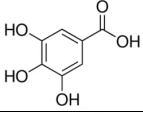   | 188.13          | 170.02152  | 4.21 | 0.70 | 8.14 ± 0.26 μM [27]      |
| Castalagin (2)                |    | 934.64          | 934.07123  | 7.14 | 2.03 | 15 μM equiv. Trolox [28] |
| Protocatechuic acid (3)       |    | 154.12          | 154.02661  | 4.26 | 0.86 | 147.3 ± 3.6 μM [29]      |
| Latifolicinin C acid (4)      |    | 182.17          | 182.05791  | *    | *    | *                        |
| Protocatechuic aldehyde (5)   |    | 138.12          | 138.03169  | 7.46 | 1.08 | 74.2 ± 1.2 μM [29]       |
| Brevifolincarboxylic acid (6) |   | 292.2           | 292.02192  | 2.91 | 0.41 | 4.6 μM [30]              |
| Ellagic acid (7)              |  | 302.19          | 302.00627  | 5.54 | 0.24 | 4.60 ± 0.15 μM [27]      |
| Aesculetin (8)                |  | 178.14          | 178.02661  | 7.91 | 0.98 | 25.18 μM [31]            |

\* unreported data. **pKa** and **logP** predicted by Chemaxon for castalagin, protocatechuic aldehyde, brevifolincarboxylic acid, aesculetin and reported in PubChem for gallic acid, protocatechuic acid and ellagic acid.
